# Supplementary material for: Liquid crystalline radicals: discotic behavior of unsymmetrical derivatives of 1,3,5-triphenyl-6-oxoverdazyl
Source: Royal Society of Chemistry journal article supplement (doi:10.1039/c3tc31984a), 2013-11-22
Supplement: c3tc31984a.pdf [file c3tc31984a.pdf]

## Electronic Supplementary Information for

### **Liquid crystalline radicals: Discotic behavior of unsymmetric derivatives of 1,3,5-triphenyl-6-oxoverdazyl**

Aleksandra Jankowiak,<sup>a</sup> Damian Pocięcha,<sup>b</sup> Jacek Szczytko,<sup>c</sup> Hirosato Monobe,<sup>d</sup> and  
Piotr Kaszyński\*<sup>a,e</sup>

<sup>a</sup> *Organic Materials Research Group*, Department of Chemistry, Vanderbilt University, Nashville, TN 37235, USA

<sup>b</sup> Department of Chemistry, University of Warsaw, Żwirki i Wigury 101, 02-089 Warsaw, Poland

<sup>c</sup> *Institute of Experimental Physics*, Faculty of Physics, University of Warsaw, Hoża 69, 00-681 Warsaw, Poland

<sup>d</sup> *Research Institute for Ubiquitous Energy Devices*, National Institute of Advanced Industrial Science and Technology, AIST Kansai Centre, Ikeda, Osaka 563-8577, Japan

<sup>e</sup> Faculty of Chemistry, University of Łódź, Tamka 12, 91403 Łódź, Poland

#### **Table of Content:**

|                                                                           |         |
|---------------------------------------------------------------------------|---------|
| 1. Additional synthetic details                                           | ....S2  |
| 2. Powder XRD measurements                                                | ....S4  |
| 3. $\alpha$ -FMO contours                                                 | ....S8  |
| 4. Partial data for TD-DFT calculation (B3LYP/6-31G(d,p)) for <b>1[1]</b> | ....S9  |
| 5. Archive data for B3LYP/6-31G(d,p) geometry optimizations               | ....S15 |
| 6. References                                                             | ....S21 |

## 1. Additional synthetic details

Reagents and solvents were obtained commercially. Reactions were carried out under Ar, and subsequent manipulations were conducted in air.  $^1\text{H}$  NMR spectra were obtained at 400 MHz ( $^1\text{H}$ ) in  $\text{CDCl}_3$  and referenced to the solvent unless stated otherwise.

**Hydrazones 4[10]. General Procedure.** To a solution of crude 3,4,5-tri(decyloxyphenyl)hydrazine<sup>1</sup> or 3,4,5-tri(decylsulfanyl)phenylhydrazine<sup>1</sup> (**2[10]**, 1.3 mmol) and 3,4,5-tri(decyloxy)benzaldehyde<sup>2,3</sup> or 3,4,5-tri(decylsulfanyl)benzaldehyde<sup>4</sup> (**3[10]**, 1.0 mmol) in EtOH (4 mL) 1 drop of AcOH was added. The mixture was refluxed for 1 h under Ar, cooled to rt, solvent was evaporated, and traces of AcOH removed on vacuum to give 90~% yield of crude hydrazone **4[10]** (~70% pure), which was used for the next step without additional purification.

**3,4,5-Tri(decyloxy)benzaldehyde**    **3,4,5-tri(decylsulfanyl)phenylhydrazine**    **4[10]**  
(**X=S,Y=O**).

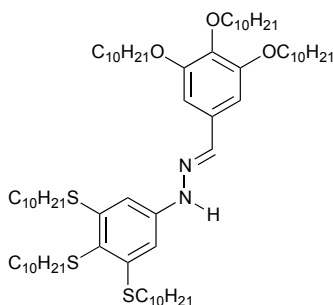

$^1\text{H}$  NMR (400 MHz,  $\text{CDCl}_3$ )  $\delta$  0.85-0.91 (m, 18H), 1.20-1.42 (m, 72H), 1.43-1.52 (m, 12H), 1.55-1.62 (m, 2H), 1.75 (quin,  $J = 7.2$  Hz, 6H), 1.80 (quin,  $J = 7.0$  Hz, 4H), 2.79 (t,  $J = 6.6$  Hz, 2H), 2.89 (t,  $J = 6.6$  Hz, 4H), 3.98 (t,  $J = 6.1$  Hz, 2H), 4.01 (t,  $J = 6.4$  Hz, 4H), 6.65 (s, 2H), 6.84 (s, 2H), 7.57 (s, 1H), 7.58 (s, 1H).

**3,4,5-Tri(decylsulfanyl)benzaldehyde 3,4,5-tri(decyloxy)phenylhydrazone 4[10]**  
**(X=O,Y=S).**

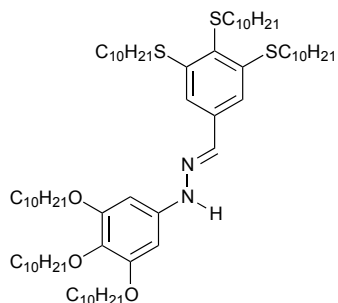

$^1\text{H}$  NMR (400 MHz,  $\text{CDCl}_3$ ) (major signals) d 0.84-0.92 (m, 18H), 1.20-1.41 (m, 72H), 1.43-1.52 (m, 12H), 1.55-1.64 (m, 2H), 1.68-1.86 (m, 10H), 2.85 (t,  $J = 7.4$  Hz, 2H), 2.92 (t,  $J = 7.5$  Hz, 4H), 3.89 (t,  $J = 6.5$  Hz, 2H), 3.98 (t,  $J = 6.4$  Hz, 4H), 6.33 (s, 2H), 7.15 (s, 2H), 7.56 (s, 2H).

**Carbamoyl chlorides 5[10]. General Procedure.** To a solution of crude hydrazone **4[10]** (1.0 mmol) in dry  $\text{CH}_2\text{Cl}_2$  (10 mL) pyridine (1.2 mmol) followed by triphosgene (297 mg, 1.0 mmol) were added under Ar. The mixture was stirred at ambient temperature for 4 hrs, 1% HCl was added, organic products were extracted ( $\text{CH}_2\text{Cl}_2$ ), extracts dried ( $\text{Na}_2\text{SO}_4$ ), and solvent evaporated. The crude product was purified on a short silica gel column (hexane /  $\text{CH}_2\text{Cl}_2$ , 4:1) to give chloride **5[10]** as yellowish viscous oil in yields ~50%.

**3,4,5-Tri(decylsulfanyl)benzaldehyde-chloroformyl-3,4,5-tri(decyloxy)phenylhydrazone 5[10](X=O,Y=S).**

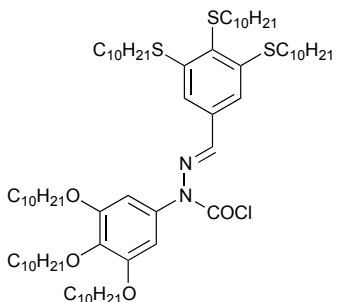

$^1\text{H}$  NMR (400 MHz,  $\text{CDCl}_3$ )  $\delta$  0.84-0.91 (m, 18H), 1.20-1.38 (m, 72H), 1.42-1.52 (m, 12H), 1.53-1.62 (m, 2H), 1.73 (quin,  $J = 7.5$  Hz, 6H), 1.80 (quin,  $J = 7.1$  Hz, 4H), 2.84 (t,

$J = 7.4$  Hz, 2H), 2.89 (t,  $J = 7.3$  Hz, 4H), 3.93 (t,  $J = 6.5$  Hz, 4H), 4.03 (t,  $J = 6.5$  Hz, 2H), 6.40 (s, 2H), 7.15 (s, 2H), 7.24 (s, 1H). Molecular ions in MS were not observed.

**3,4,5-Tri(decyloxy)benzaldehyde-chloroformyl-3,4,5-tri(decylsulfanyl)phenylhydraz**  
**one 5[10] (X=S,Y=O).**

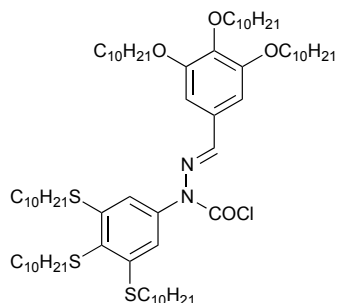

$^1\text{H}$  NMR (400 MHz,  $\text{CDCl}_3$ )  $\delta$  0.84-0.91 (m, 18H), 1.20-1.38 (m, 72H), 1.39-1.50 (m, 12H), 1.62-1.76 (m, 8H), 1.80 (quin,  $J = 7.4$  Hz, 4H), 2.81 (t,  $J = 7.4$  Hz, 4H), 2.91 (t,  $J = 7.4$  Hz, 2H), 3.98 (t,  $J = 6.5$  Hz, 6H), 6.67 (s, 2H), 6.87 (s, 2H), 7.28 (s, 1H). HRMS calcd for  $\text{C}_{74}\text{H}_{132}\text{ClN}_2\text{O}_4\text{S}_3$   $m/z$  1243.9032; found  $m/z$  1243.9018.

**2,6-Di(3,4,5-tridecyloxyphenyl)-4-(3,4,5-tridecylsulfanylphenyl)-1,2,4,5-tetrazine-3-**  
**one 6[10]d.**

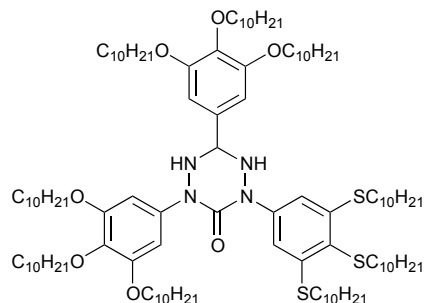

$^1\text{H}$  NMR (400 MHz,  $\text{CDCl}_3$ )  $\delta$  0.84-0.94 (m, 27H), 1.20-1.51 (m, 126H), 1.52-1.64 (m, 8H), 1.65-1.83 (m, 10H), 2.61 (t,  $J = 7.1$  Hz, 4H), 2.81 (t,  $J = 7.5$  Hz, 2H), 3.91 (t,  $J = 6.6$  Hz, 4H), 3.93 (t,  $J = 6.5$  Hz, 8H), 4.71 (d,  $J = 8.5$  Hz, 2H), 5.46 (t,  $J = 8.5$  Hz, 1H), 6.81 (s, 4H), 6.99 (s, 2H). The molecular ion in MS was not observed.

**2. Powder XRD measurements**

X-ray diffraction experiments were performed with Bruker D8 GADDS ( $\text{Cu K}\alpha$ )

radiation, Göbel mirror, point collimator, Vantec 2000 area detector) equipped with a modified Linkam heating stage and with Bruker NanoStar small angle diffractometer (Cu  $K_{\alpha}$  radiation, cross-coupled Göbel mirrors, 3 pinhole collimator, Vantec 2000 area detector). Samples were prepared in a form of a thin film or a droplet on heated surface. The X-ray beam was incident nearly parallel to sample surface, and resulting XRD patterns were recorded as a function of temperature.

Experimental pattern was at first indexed using indexing procedure implemented in Topas I software (Bruker), in this step a space group was found as well rough estimation of unit cell parameter. Next, the whole pattern was fitted using Topas software, assuming previously determined lattice symmetry and taking unit cell dimensions and background parameters as fitted variables (so called 'hkl phase'). In this procedure the intensity of each simulated peak is an independent variable with no physical meaning.

Results are shown in Fig. S1 and S2 and Tables S1- S5.

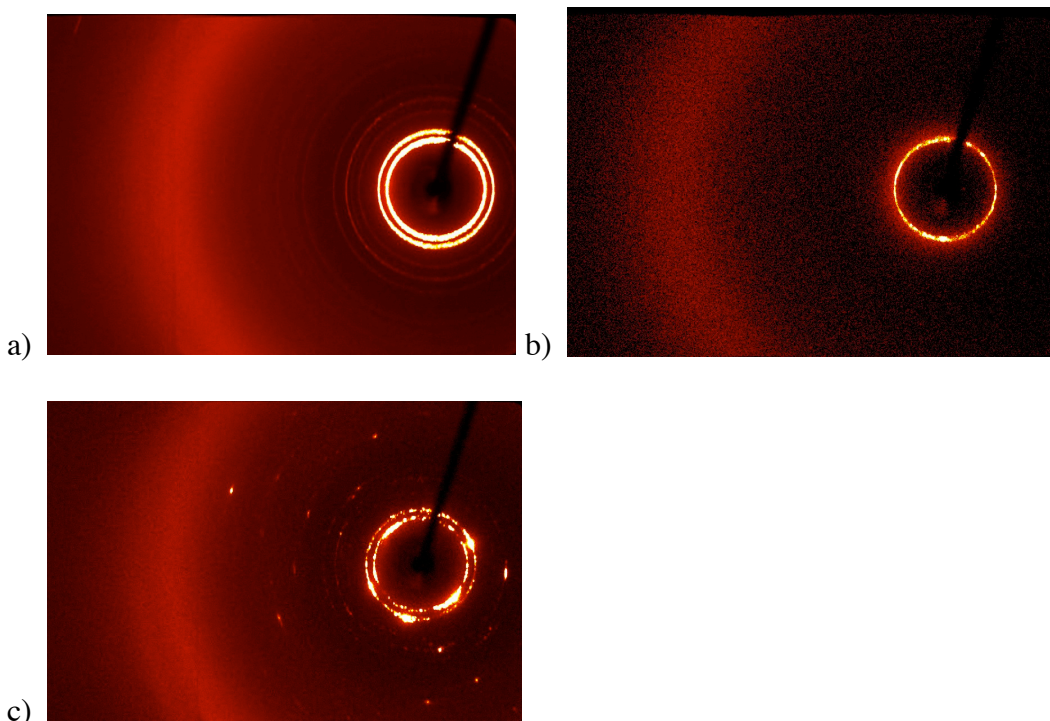

**Fig. S1.** 2D patterns for **1[10]d**: a)  $Col_{h(3D)}$  phase at 70 °C, sample heated from the crystalline phase; b)  $Col_h$  phase at 78 °C, sample cooled from the isotropic phase; c)  $Col_{h(3D)}$  phase at 70 °C, sample cooled from the  $Col_h$  phase.

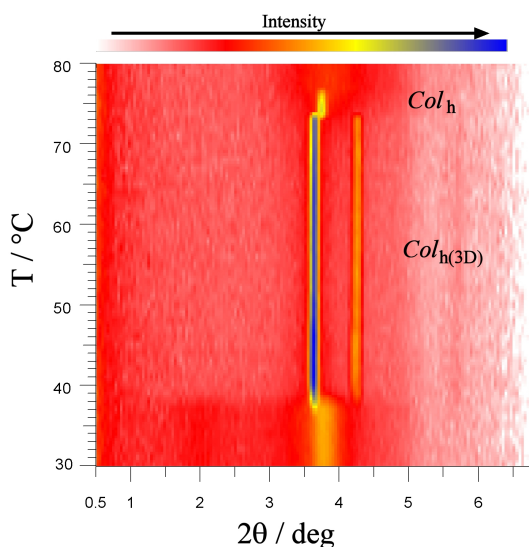

**Fig. S2.** Temperature dependence of the position of low angle reflections for **1d[10]** recorded on cooling.

**Table S1.** Selected X-ray diffraction data for **1[10]c**.

| Temp<br>/°C | Phase   | Miller<br>indices<br><i>hk</i> | $d_{meas}$<br>/Å<br>obs | $d_{calcd}$<br>/Å<br>calcd | Cell<br>parameter<br>/Å |
|-------------|---------|--------------------------------|-------------------------|----------------------------|-------------------------|
| 75          | $Col_h$ | 10                             | 23.55                   | 23.55                      | $a = 27.19$             |
|             |         | 11                             | 13.58                   | 13.59                      |                         |
|             |         | 20                             | 11.78                   | 11.77                      |                         |

**Table S2.** Selected X-ray diffraction data for **1[10]d** at 78 °C.

| Temp<br>/°C | Phase   | Miller<br>indices<br><i>hk</i> | $d_{meas}$<br>/Å<br>obs | $d_{calcd}$<br>/Å<br>calcd | Cell<br>parameter<br>/Å |
|-------------|---------|--------------------------------|-------------------------|----------------------------|-------------------------|
| 78          | $Col_h$ | 10                             | 23.44                   | 23.43                      | $a = 27.05$             |
|             |         | 11                             | 13.52                   | 13.53                      |                         |

**Table S3.** X-ray diffraction data for **1[10]d** at 70 °C.

| Temp<br>/°C | Phase         | Miller<br>indices<br><i>hkl</i> | $d_{meas}$<br>/Å<br>obs | $D_{calcd}$<br>/Å<br>calcd | Cell<br>parameters<br>/Å |
|-------------|---------------|---------------------------------|-------------------------|----------------------------|--------------------------|
| 70          | $Col_{h(3D)}$ | 100                             | 24.15                   | 24.14                      | $a = 27.9$<br>$c = 39.7$ |
|             |               | 101                             | 20.64                   | 20.63                      |                          |
|             |               | 102                             | 15.36                   | 15.36                      |                          |
|             |               | 110                             | 13.98                   | 13.97                      |                          |
|             |               | 111                             | 13.19                   | 13.18                      |                          |
|             |               | 201                             | 11.57                   | 11.57                      |                          |
|             |               | 210                             | 9.15                    | 9.14                       |                          |
|             |               | 211                             | 8.92                    | 8.92                       |                          |
|             |               | 212                             | 8.32                    | 8.32                       |                          |
|             |               | 300                             | 8.06                    | 8.06                       |                          |
|             |               | 213                             | 7.49                    | 7.52                       |                          |
|             |               | 302                             | 7.49                    | 7.47                       |                          |
|             |               | 220                             | 6.98                    | 6.98                       |                          |
|             |               | 214                             | 6.72                    | 6.73                       |                          |
|             |               | 310                             | 6.72                    | 6.71                       |                          |
|             |               | 400                             | 6.05                    | 6.05                       |                          |
| 314         | 5.57          | 5.56                            |                         |                            |                          |

**Table S4.** X-ray diffraction data for **1[10]e**.

| Temp<br>/°C | Phase         | Miller<br>indices<br><i>hkl</i> | $d_{meas}$<br>/Å<br>obs | $d_{calcd}$<br>/Å<br>calcd | Cell<br>parameters<br>/Å   |
|-------------|---------------|---------------------------------|-------------------------|----------------------------|----------------------------|
| 65          | $Col_{h(3D)}$ | 100                             | 24.01                   | 24.01                      | $a = 27.72$<br>$c = 38.26$ |
|             |               | 101                             | 20.34                   | 20.34                      |                            |
|             |               | 102                             | 14.95                   | 14.96                      |                            |
|             |               | 110                             | 13.88                   | 13.86                      |                            |
|             |               | 111                             | 13.05                   | 13.03                      |                            |
|             |               | 201                             | 11.47                   | 11.45                      |                            |
|             |               | 210                             | 9.08                    | 9.08                       |                            |
|             |               | 211                             | 8.85                    | 8.83                       |                            |
|             |               | 212                             | 8.21                    | 8.20                       |                            |
|             |               | 300                             | 8.02                    | 8.00                       |                            |
|             |               | 213                             | 7.40                    | 7.39                       |                            |
|             |               | 220                             | 6.96                    | 6.93                       |                            |
|             |               | 310                             | 6.68                    | 6.66                       |                            |
|             |               | 400                             | 6.02                    | 6.00                       |                            |

**Table S5.** X-ray diffraction data for **1[10]f**.

| Temp<br>/°C | Phase         | Miller                | $d_{meas}$ | $d_{calcd}$ | Cell<br>parameters<br>/Å   |
|-------------|---------------|-----------------------|------------|-------------|----------------------------|
|             |               | indices<br><i>hkl</i> | /Å<br>obs  | /Å<br>calcd |                            |
| 90          | $Col_{h(3D)}$ | 100                   | 24.47      | 24.47       | $a = 27.72$<br>$c = 38.26$ |
|             |               | 101                   | 21.75      | 21.75       |                            |
|             |               | 102                   | 17.03      | 17.04       |                            |
|             |               | 110                   | 14.14      | 14.12       |                            |
|             |               | 111                   | 13.55      | 13.54       |                            |
|             |               | 201                   | 11.86      | 11.85       |                            |
|             |               | 202                   | 10.86      | 10.87       |                            |
|             |               | 210                   | 9.26       | 9.25        |                            |
|             |               | 211                   | 9.09       | 9.08        |                            |
|             |               | 212                   | 8.62       | 8.62        |                            |
|             |               | 300                   | 8.17       | 8.15        |                            |
|             |               | 213                   | 7.99       | 7.98        |                            |
|             |               | 302                   | 7.72       | 7.71        |                            |
|             |               | 303                   | 7.26       | 7.25        |                            |
|             |               | 220                   | 7.06       | 7.06        |                            |
|             |               | 310                   | 6.79       | 6.79        |                            |
|             |               | 223                   | 6.46       | 6.45        |                            |
| 400         | 6.14          | 6.12                  |            |             |                            |
| 320         | 5.63          | 5.61                  |            |             |                            |

### 3. $\alpha$ -FMO contours

Contours of  $\alpha$ -FMOs are shown in Fig. S3.

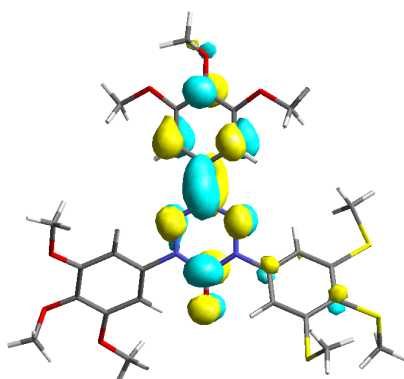

$\alpha$ -LUMO,  $E = -1.24$  eV

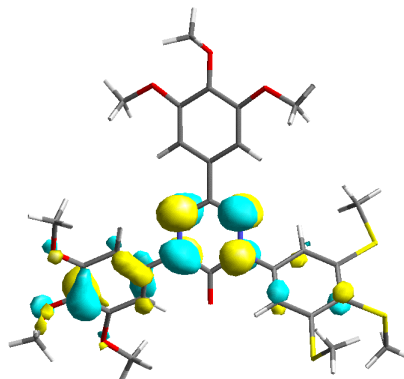

$\alpha$ -HOMO,  $E = -5.20$  eV

**Fig. S3.** Contours and energies  $\alpha$ -FMOs involved in low energy excitations in **1[1]c**.



#### 4. Partial data for TD-DFT calculation (B3LYP/6-31G(d,p)) for 1[1]

##### 1[1]a

Excited State 1: 2.062-A 2.0457 eV 606.07 nm f=0.0010  
<S\*\*2>=0.812

192B ->194B -0.37502

193B ->194B 0.91979

This state for optimization and/or second-order correction.

Total Energy, E(TD-HF/TD-KS) = -5002.80596109

Copying the excited state density for this state as the 1-particle RhoCI density.

Excited State 2: 2.063-A 2.0755 eV 597.38 nm f=0.0003  
<S\*\*2>=0.814

191B ->194B 0.99310

Excited State 3: 2.042-A 2.1024 eV 589.73 nm f=0.0157  
<S\*\*2>=0.792

192B ->194B 0.92314

193B ->194B 0.37741

Excited State 4: 2.040-A 2.1163 eV 585.84 nm f=0.0524  
<S\*\*2>=0.790

194A ->195A -0.16144

184B ->194B -0.28351

190B ->194B 0.92868

Excited State 5: 2.113-A 2.3260 eV 533.03 nm f=0.0139  
<S\*\*2>=0.866

183B ->194B 0.19690

188B ->194B 0.96046

Excited State 6: 2.086-A 2.3418 eV 529.44 nm f=0.0272  
<S\*\*2>=0.838

194A ->195A -0.13465

189B ->194B 0.97350

##### 1[1]b

Excited State 1: 2.028-A 2.0192 eV 614.01 nm f=0.0731  
<S\*\*2>=0.778

158A ->159A -0.12199

158A ->160A -0.10337

150B ->158B 0.11329

**157B ->158B 0.96577**

This state for optimization and/or second-order correction.

Total Energy, E(TD-HF/TD-KS) = -2095.97900447

Copying the excited state density for this state as the 1-particle RhoCI density.

Excited State 2: 2.075-A 2.4130 eV 513.82 nm f=0.0480  
<S\*\*2>=0.827

158A ->159A -0.21386

151B ->158B -0.15964

154B ->158B -0.10715

155B ->158B 0.11502

**156B ->158B 0.92556**

Excited State 3: 2.121-A 2.4543 eV 505.17 nm f=0.0432  
<S\*\*2>=0.874  
158A ->161A -0.10493  
152B ->158B 0.14003  
**155B ->158B 0.95141**  
156B ->158B -0.12615

Excited State 4: 2.061-A 2.4845 eV 499.03 nm f=0.0016  
<S\*\*2>=0.812  
**154B ->158B 0.98271**  
156B ->158B 0.11600

Excited State 5: 2.063-A 2.5311 eV 489.84 nm f=0.0076  
<S\*\*2>=0.814  
**152B ->158B 0.83172**  
**153B ->158B 0.51881**  
155B ->158B -0.15783

Excited State 6: 2.048-A 2.5765 eV 481.21 nm f=0.0001  
<S\*\*2>=0.799  
152B ->158B -0.52395  
**153B ->158B 0.84328**

Excited State 7: 2.049-A 2.7375 eV 452.91 nm f=0.0069  
<S\*\*2>=0.800  
144B ->158B -0.13496  
147B ->158B -0.31954  
149B ->158B 0.12092  
150B ->158B -0.23389  
151B ->158B 0.85417  
154B ->158B -0.10152  
156B ->158B 0.15774

### 1[1]c

Excited State 1: 2.026-A 1.9656 eV 630.78 nm f=0.0597  
<S\*\*2>=0.776  
170A ->171A -0.100045  
162B ->170B 0.12621  
169B ->170B 0.96559

This state for optimization and/or second-order correction.

Total Energy, E(TD-HF/TD-KS) = -3064.92111189

Copying the excited state density for this state as the 1-particle RhoCI density.

Excited State 2: 2.078-A 2.3174 eV 535.01 nm f=0.0529  
<S\*\*2>=0.830  
170A ->171A 0.13680  
161B ->170B 0.10648  
166B ->170B 0.10625  
167B ->170B -0.65912  
168B ->170B 0.69312

Excited State 3: 2.091-A 2.3508 eV 527.42 nm f=0.0103  
<S\*\*2>=0.843

165B ->170B -0.30728  
167B ->170B 0.64834  
168B ->170B 0.67073

Excited State 4: 2.065-A 2.4031 eV 515.94 nm f=0.0092  
<S\*\*2>=0.816

164B ->170B -0.10479  
165B ->170B 0.93130  
167B ->170B 0.28536  
168B ->170B 0.15511

Excited State 5: 2.050-A 2.4585 eV 504.31 nm f=0.0102  
<S\*\*2>=0.801

164B ->170B 0.81843  
165B ->170B 0.10050  
166B ->170B -0.54151

Excited State 6: 2.086-A 2.4948 eV 496.98 nm f=0.0026  
<S\*\*2>=0.838

162B ->170B -0.10932  
164B ->170B 0.55103  
166B ->170B 0.79953

Excited State 7: 2.045-A 2.6883 eV 461.19 nm f=0.0032  
<S\*\*2>=0.796

158B ->170B -0.16749  
159B ->170B 0.36856  
161B ->170B 0.76239  
162B ->170B 0.33580  
163B ->170B -0.22405  
166B ->170B 0.12215  
167B ->170B 0.11657

### 1d[1]

Excited State 1: 2.051-A 2.0722 eV 598.31 nm f=0.1094  
<S\*\*2>=0.802

170A ->171A -0.13870  
162B ->170B 0.15620  
169B ->170B 0.95268

This state for optimization and/or second-order correction.

Total Energy, E(TD-HF/TD-KS) = -3064.91744100

Copying the excited state density for this state as the 1-particle RhoCI density.

Excited State 2: 2.077-A 2.3594 eV 525.48 nm f=0.0252  
<S\*\*2>=0.829  
170A ->171A -0.11459  
165B ->170B -0.33336  
166B ->170B 0.59988  
168B ->170B 0.68593

Excited State 3: 2.062-A 2.3895 eV 518.86 nm f=0.0196  
<S\*\*2>=0.813  
170A ->171A -0.12203  
165B ->170B 0.76209  
166B ->170B -0.26231  
168B ->170B 0.55569

Excited State 4: 2.076-A 2.4364 eV 508.89 nm f=0.0136  
<S\*\*2>=0.827  
170A ->171A 0.19281  
164B ->170B 0.35388  
165B ->170B 0.47831  
166B ->170B 0.63992  
167B ->170B -0.15284  
168B ->170B -0.34637

Excited State 5: 2.070-A 2.4689 eV 502.17 nm f=0.0122  
<S\*\*2>=0.821  
164B ->170B 0.92325  
165B ->170B -0.21577  
166B ->170B -0.26740

Excited State 6: 2.043-A 2.5320 eV 489.67 nm f=0.0042  
<S\*\*2>=0.794  
164A ->171A -0.10052  
170A ->171A -0.45989  
162B ->170B 0.24131  
166B ->170B 0.22386  
167B ->170B 0.76931  
168B ->170B -0.17918

### 1e[1]

Excited State 1: 2.055-A 2.0470 eV 605.69 nm f=0.0963  
<S\*\*2>=0.805  
182A ->183A -0.11942  
173B ->182B 0.19487  
177B ->182B 0.17639  
180B ->182B -0.15938

181B ->182B 0.92122

This state for optimization and/or second-order correction.

Total Energy, E(TD-HF/TD-KS) = -4033.85816745

Copying the excited state density for this state as the 1-particle RhoCI density.

Excited State 2: 2.077-A 2.2127 eV 560.33 nm f=0.0130  
<S\*\*2>=0.829

177B ->182B -0.17248  
179B ->182B -0.21704  
180B ->182B 0.91712  
181B ->182B 0.21408

Excited State 3: 2.052-A 2.3153 eV 535.51 nm f=0.0148  
<S\*\*2>=0.803

176B ->182B -0.32462  
177B ->182B 0.56653  
178B ->182B 0.29515  
179B ->182B 0.60515  
180B ->182B 0.28610

Excited State 4: 2.058-A 2.3328 eV 531.49 nm f=0.0028  
<S\*\*2>=0.809

176B ->182B 0.87178  
178B ->182B 0.11872  
179B ->182B 0.45662

Excited State 5: 2.083-A 2.3621 eV 524.89 nm f=0.0176  
<S\*\*2>=0.835

173B ->182B -0.11925  
176B ->182B 0.32863  
177B ->182B 0.67897  
178B ->182B 0.19478  
179B ->182B -0.57600  
181B ->182B -0.11738

Excited State 6: 2.045-A 2.4245 eV 511.38 nm f=0.0061  
<S\*\*2>=0.795

182A ->183A -0.17279  
173B ->182B 0.17363  
177B ->182B -0.29491  
178B ->182B 0.89509  
179B ->182B -0.13599

Excited State 7: 2.030-A 2.6129 eV 474.50 nm f=0.0037  
<S\*\*2>=0.781

|             |          |
|-------------|----------|
| 176A ->183A | -0.14223 |
| 182A ->183A | 0.66800  |
| 169B ->182B | 0.10135  |
| 170B ->182B | -0.15862 |
| 171B ->182B | 0.14837  |
| 172B ->182B | 0.18732  |
| 173B ->182B | -0.47388 |
| 174B ->182B | 0.10463  |
| 175B ->182B | 0.15035  |
| 177B ->182B | -0.19943 |
| 178B ->182B | 0.18923  |
| 180B ->182B | -0.16608 |
| 181B ->182B | 0.18493  |

### 1f[1]

Excited State 1: 2.019-A 1.9102 eV 649.07 nm f=0.0325

<S\*\*2>=0.769

|             |         |
|-------------|---------|
| 182A ->184A | 0.10392 |
| 173B ->182B | 0.13331 |
| 181B ->182B | 0.96748 |

This state for optimization and/or second-order correction.

Total Energy, E(TD-HF/TD-KS) = -4033.86347112

Copying the excited state density for this state as the 1-particle RhoCI density.

Excited State 2: 2.087-A 2.1927 eV 565.44 nm f=0.0074

<S\*\*2>=0.839

|             |         |
|-------------|---------|
| 180B ->182B | 0.98430 |
|-------------|---------|

Excited State 3: 2.088-A 2.2688 eV 546.49 nm f=0.0150

<S\*\*2>=0.840

|             |         |
|-------------|---------|
| 177B ->182B | 0.16754 |
| 179B ->182B | 0.96771 |

Excited State 4: 2.040-A 2.3272 eV 532.76 nm f=0.0111

<S\*\*2>=0.791

|             |          |
|-------------|----------|
| 176B ->182B | 0.94343  |
| 177B ->182B | -0.22535 |
| 178B ->182B | 0.23171  |

Excited State 5: 2.075-A 2.3915 eV 518.44 nm f=0.0121

<S\*\*2>=0.827

|             |          |
|-------------|----------|
| 173B ->182B | -0.10209 |
| 177B ->182B | 0.63171  |
| 178B ->182B | 0.73518  |

179B ->182B -0.16225

Excited State 6: 2.075-A 2.3963 eV 517.39 nm f=0.0039  
<S\*\*2>=0.826

170B ->182B -0.11477  
171B ->182B 0.10840  
176B ->182B 0.31818  
177B ->182B 0.68620  
178B ->182B -0.60514

Excited State 7: 2.049-A 2.6249 eV 472.33 nm f=0.0046  
<S\*\*2>=0.799

170B ->182B 0.57246  
171B ->182B -0.51760  
173B ->182B 0.48849  
174B ->182B 0.21853  
175B ->182B -0.14318  
177B ->182B 0.16370

## 5. Archive data for B3LYP/6-31G(d,p) geometry optimizations

### 1[1]a

1\1\GINC-OCTOPUS\SP\UTD-B3LYP-FC\6-31G(d,p)\C29H33N4O1S9(2)\PIOTR\25-J  
an-2011\0\#\#P UB3LYP/6-31G(d,p) TD(NStates=20) SCF=tight Geom(NoAngle,  
noDistance, check) #P guess=check\1,3,5-(3,4,5-MeSphenyl)-6-oxoverda  
zyl, C1 at the DFT geom\0,2\O,0,0.0282047059,-0.115285422,-0.09465078  
99\C,0,0.0341840566,-0.0158818497,1.1184053093\N,0,1.2097727394,0.0339  
011276,1.8840053605\N,0,1.2340553281,0.1850049261,3.2418620169\C,0,0.0  
48203188,0.2620406031,3.84516135\N,0,-1.143869026,0.2099718223,3.25153  
81388\N,0,-1.1338265255,0.0584091974,1.8935521975\C,0,-2.4298307769,0.  
1060734125,1.2734936909\C,0,-2.7271343253,-0.7013505819,0.1760860063\C  
,0,-4.0075412247,-0.6488514385,-0.3856674812\C,0,-4.9923138599,0.19663  
30979,0.169240541\C,0,-4.6696778266,1.0070263069,1.279757275\C,0,-3.38  
55819849,0.9572960119,1.8299860019\C,0,0.0556756319,0.3989309154,5.327  
44636\C,0,-1.1534535099,0.4743015972,6.025603415\C,0,-1.1542485945,0.6  
055537273,7.4180091668\C,0,0.0697690933,0.6598762735,8.1198555002\C,0,  
1.2866297692,0.5802930479,7.4080520535\C,0,1.2717575348,0.4492071069,6  
.0157040126\C,0,2.501389754,0.0545208574,1.2533969821\C,0,3.4792162582  
,0.8855578587,1.8019937329\C,0,4.7595346629,0.9085084079,1.2413020042\  
C,0,5.0561092081,0.0916381292,0.1282705941\C,0,4.0494072474,-0.7330613  
711,-0.418504681\C,0,2.7728041052,-0.7588496906,0.1536758186\S,0,-6.62  
71232111,0.2791084541,-0.5617215003\S,0,6.6862605348,0.140041174,-0.61  
6033722\H,0,-3.1062504279,1.5593719515,2.6814660276\S,0,-5.9491868546,  
2.0722232786,1.9255112552\C,0,-5.1408147936,2.8423316662,3.3693073\H,0  
, -5.9055064081,3.4834902871,3.8128002351\H,0,-4.8322103338,2.098626375  
7,4.1080419798\H,0,-4.2897339292,3.4627763604,3.0794249038\C,0,-7.4891  
455773,-1.0407079487,0.3822540247\H,0,-7.5136681529,-0.7975797553,1.44  
56970601\H,0,-8.510036824,-1.0742661012,-0.0049805729\H,0,-7.008246138  
8,-2.0060160205,0.2163973514\S,0,-4.4649706139,-1.6364660507,-1.800664  
5879\H,0,-1.9640660583,-1.3427671169,-0.23190469\H,0,2.1876515405,0.38  
1412344,5.4471690179\C,0,-2.9382690651,-2.576204754,-2.1471581968\H,0,  
-2.1037004468,-1.9153001577,-2.3916871807\H,0,-2.6683405766,-3.2393203

656,-1.321760906\H,0,-3.1754215833,-3.1838435429,-3.023038255\S,0,2.80  
18152764,0.6453765696,8.3525977679\C,0,4.0782320055,0.3320646277,7.085  
9242997\H,0,5.0215800534,0.3042804772,7.6353902463\H,0,3.9305359804,-0  
.6281766788,6.5867818037\H,0,4.1268229066,1.1369261066,6.3483957757\S,  
0,0.0792919426,0.8788192227,9.8998544905\C,0,0.0636384143,-0.870203847  
5,10.4616920193\H,0,0.0686461157,-0.8387241185,11.5535863105\H,0,-0.84  
14781448,-1.3737119037,10.1185292538\H,0,0.9551868454,-1.3922614894,10  
.1108238073\S,0,-2.6600067656,0.7018927474,8.3748782276\H,0,-2.0751590  
978,0.4255118041,5.4645627751\H,0,1.9932053974,-1.38416112,-0.24801468  
83\C,0,-3.9529310866,0.4153033619,7.1186648149\H,0,-3.9908360325,1.221  
1065019,6.3815372498\H,0,-3.8292624298,-0.5477204422,6.6183531074\H,0,  
-4.8921384593,0.4070108377,7.6758104419\S,0,4.4745492048,-1.7298931141  
,-1.8371082576\C,0,2.925744853,-2.6374273299,-2.1711405915\H,0,2.64874  
77024,-3.2948979875,-1.3435722751\H,0,2.1032150372,-1.9591687025,-2.40  
88467854\H,0,3.1429793178,-3.2497408205,-3.048929553\C,0,7.5282979477,  
-1.1973609942,0.3212018714\H,0,7.0260678353,-2.1524606859,0.1595133211  
\H,0,8.5450784576,-1.2522040072,-0.0743274305\H,0,7.5665482906,-0.9547  
109069,1.3843494595\S,0,6.0662234341,1.9467359545,1.8764617715\H,0,3.2  
194669676,1.4932908733,2.6556526095\C,0,5.2858610184,2.7335650972,3.32  
66366595\H,0,6.0673163762,3.358787796,3.763699623\H,0,4.4455071774,3.  
6715369396,3.0435830274\H,0,4.9679407495,1.9964770963,4.0680467273\Ve  
rsion=EM64L-G09RevA.02\State=2-A\HF=-5002.8811391\S2=0.773538\S2-1=0.\  
S2A=0.750252\RMSD=8.579e-09\PG=C01 [X(C29H33N4O1S9)]\

## 1[1]b

1\1\GINC-OCTOPUS\FOpt\UB3LYP\6-31G(d,p)\C29H33N4O10(2)\PIOTR\16-Nov-20  
11\0\#\#P B3LYP/6-31G(d,p) FOpt Geom(NoAngle, noDistance) fcheck freq=n  
oraman\1,3,5-(3,4,5-MeOphenyl)-6-oxoverdazyl, C1\0,2\O,-0.0621290594  
,-0.5197023953,0.0730087124\C,-0.024801063,-0.2280759499,1.2564537525\  
N,1.1666267504,-0.1400466245,1.9913766149\N,1.2256409684,0.2086402802,  
3.3129166548\C,0.0568983977,0.4234807479,3.9155208874\N,-1.1480708619,  
0.3515544799,3.3509420331\N,-1.1699541074,0.0515776475,2.016747988\C,-  
2.4874435072,-0.0712729003,1.4543303311\C,-2.7474635592,0.3202968131,0  
.1388263337\C,-4.0529924142,0.2125388405,-0.3508282226\C,-5.0927302628  
,-0.2635614568,0.4669578281\C,-4.8034803184,-0.6544762729,1.7863624197  
\C,-3.5021076976,-0.55328083,2.2861700673\C,0.1012886246,0.7796759617,  
5.357363623\C,-1.0468675288,1.2791738755,5.9835667064\C,-1.0038580246,  
1.6180853306,7.33919354\C,0.1885866621,1.4692411052,8.0701739334\C,1.3  
308737938,0.9532410126,7.4318067826\C,1.2909413161,0.6134512937,6.0770  
108702\C,2.447951363,-0.3065343764,1.3604719719\C,3.5040245383,0.48220  
01352,1.8260099935\C,4.7746348522,0.3210187438,1.2662880949\C,4.986448  
412,-0.6110257577,0.2349136431\C,3.9096319767,-1.3980230882,-0.2092187  
257\C,2.6370426581,-1.2558304547,0.3528503832\O,-6.384303573,-0.302071  
2307,0.0134842806\O,6.2155742801,-0.6984720803,-0.3625153785\H,-3.2594  
615007,-0.833193218,3.3003759832\O,-5.8628106999,-1.1275027158,2.50101  
97412\C,-5.6395421623,-1.516552129,3.8467072505\H,-6.6078784584,-1.844  
5231107,4.2271903197\H,-4.9237144585,-2.3456033809,3.9180058309\H,-5.2  
768127177,-0.6787718051,4.4557839884\C,-6.7019301346,-1.4362707585,-0.  
7964157809\H,-6.5635863573,-2.3701473221,-0.2379779904\H,-7.754333513,  
-1.3326383048,-1.0685300009\H,-6.0920370419,-1.4566537354,-1.706182194  
1\O,-4.4205053524,0.5536451934,-1.6187002579\H,-1.9463442974,0.6799289  
666,-0.4853841489\H,2.1587815696,0.2177042726,5.5686411309\C,-3.419650  
5359,1.0506145504,-2.4961871604\H,-2.983405881,1.9851072408,-2.1221753  
282\H,-2.6181848301,0.3184399905,-2.65378394\H,-3.9246051254,1.2448131  
679,-3.4433461442\O,2.4302930289,0.8205012331,8.2293951419\C,3.6245649  
091,0.3288502347,7.6418910241\H,4.3680223183,0.3180423512,8.4401982064  
\H,3.4978115749,-0.6888772737,7.251331358\H,3.9743866358,0.9805977135,  
6.8312920734\O,0.2448324496,1.8756265623,9.3770080513\C,0.0432855999,0



.8351866586,10.3352888694\H,0.1126515567,1.3058815742,11.3181707676\H,  
-0.9486012697,0.3810982556,10.2216851848\H,0.8153387963,0.0621267764,1  
0.2487663736\O,-2.0626219445,2.1059506786,8.046029704\H,-1.9502232068,  
1.3961308255,5.4016717511\H,1.8063767809,-1.8483451309,0.0071154729\C,  
-3.278778749,2.3326533031,7.3511328552\H,-3.1502902192,3.0548061607,6.  
535385953\H,-3.6933307207,1.402411379,6.9413708113\H,-3.9721607834,2.7  
407909544,8.0878224526\O,4.2085312688,-2.2866131383,-1.1993899532\C,3.  
1514755489,-3.0663240869,-1.7409975456\H,2.7164054755,-3.7376666895,-0  
.9897309058\H,2.3584512048,-2.4348712146,-2.1590511675\H,3.5990716253,  
-3.6616294075,-2.5379586516\C,7.0270886939,-1.7840536956,0.090877702\H  
,6.5505615925,-2.7487091902,-0.1156653992\H,7.9648933466,-1.7176513659  
, -0.4645100841\H,7.2364758588,-1.6980937703,1.1642033257\O,5.874223005  
,1.0284194143,1.6493332333\H,3.320145299,1.1883349643,2.6216216972\C,5  
.7137808375,2.0236798417,2.6477541952\H,6.6993194643,2.4709148746,2.78  
43068562\H,5.0045397469,2.8003398688,2.3354792518\H,5.376683156,1.5944  
685872,3.6002269771\Version=EM64L-G09RevA.02\State=2-A\HF=-2096.05321  
03\S2=0.772626\S2-1=0.\S2A=0.750245\RMSD=3.626e-09\RMSF=1.600e-06\Dipo  
le=0.1055986,-1.1993507,0.2654743\Quadrupole=-2.3578312,2.2960605,0.06  
17708,1.4339123,3.98176,-2.9366495\PG=C01 [X(C29H33N4O10)]\@

## 1[1]c

1\1\GINC-OCTOPUS\FOpt\UB3LYP\6-31G(d,p)\C29H33N4O7S3(2)\PIOTR\20-Aug-2  
013\0\#P B3LYP/6-31G(d,p) FOpt Geom(NoAngle, noDistance) fcheck\1-(3  
,4,5-MeOphenyl)-3-(3,4,5-MeOphenyl)-5-(3,4,5-MeSphenyl)-6-oxoverdazyl\  
\O,2\O,0.0869327903,-0.4800583921,0.1030521906\C,0.109680264,-0.258109  
8435,1.3002635168\N,1.292617213,-0.2463984304,2.0553246609\N,1.3513040  
236,0.0518044637,3.389888133\C,0.1819020704,0.2695042002,3.9895518379\  
N,-1.0185383142,0.2510086391,3.4080052172\N,-1.0362577376,0.0139294847  
,2.062652975\C,-2.3507336534,-0.0470862808,1.4821096116\C,-2.583877089  
3,0.4044183196,0.1808267318\C,-3.8860388161,0.3528530128,-0.3267464336  
\C,-4.9480379348,-0.1268038432,0.4600659061\C,-4.6852095746,-0.5782694  
501,1.7658638647\C,-3.3875455621,-0.5339546987,2.283254669\C,0.2168575  
013,0.5636243794,5.4447962462\C,-0.9256722284,1.0695006377,6.076692663  
7\C,-0.8890666301,1.3537413047,7.4441294401\C,0.2853689032,1.1324836297  
,8.1868789089\C,1.4218830159,0.6099784822,7.5423430321\C,1.3909786182,  
0.3341711692,6.1720649765\C,2.5695114224,-0.4313539734,1.4286763754\C,  
3.6493579719,0.3027148504,1.9224989739\C,4.9238282374,0.1405834325,1.3  
718779116\C,5.1233946584,-0.7770661184,0.3128598091\C,4.0251740986,-1.  
5300940509,-0.1542475613\C,2.7515177191,-1.3531316136,0.3954440871\O,-  
6.2343520203,-0.1115406476,-0.0074159275\H,-3.1653738294,-0.8626164394  
,3.2873643976\O,-5.7651586005,-1.0493920861,2.449560268\C,-5.566355298  
3,-1.5085441437,3.7770287901\H,-6.5474432421,-1.8255233747,4.133239469  
1\H,-4.8755489673,-2.3606794175,3.8140247541\H,-5.1854136691,-0.711666  
0972,4.4284441685\C,-6.5710633728,-1.1950243476,-0.8778348868\H,-6.465  
4098962,-2.1588090685,-0.365079459\H,-7.6164602285,-1.0486822751,-1.15  
68664456\H,-5.949465479,-1.1862812275,-1.7795427159\O,-4.229307401,0.7  
560968031,-1.5825201347\H,-1.7664854926,0.7670177862,-0.4198920019\H,2  
.2536513255,-0.0679604771,5.6599301268\C,-3.203359981,1.2508741832,-2.  
4327153003\H,-2.7410359784,2.1563271261,-2.0206202524\H,-2.4253555811,  
0.4983295733,-2.6095071985\H,-3.6922517254,1.4959199691,-3.3764268669\  
O,2.5034461087,0.405224751,8.3454673983\C,3.688724284,-0.0997701319,7.  
7516971037\H,4.4183209334,-0.1755066996,8.5591222506\H,3.533087351,-1.  
0924608365,7.31037184\H,4.0749690932,0.5772704646,6.9789221891\O,0.356  
2478298,1.4716213371,9.5110510295\C,-0.2504185061,0.5378791219,10.4075  
548328\H,-0.0995241333,0.9375365258,11.4123736201\H,-1.3237897296,0.44  
08570444,10.2124691129\H,0.229398842,-0.4457701532,10.3345594242\O,-1.  
9403582424,1.8546512608,8.1558845932\H,-1.8168324436,1.2397799216,5.48  
93338006\H,1.9231195353,-1.9318467232,0.0162509632\C,-3.1381806697,2.1

558022751, 7.4561170886\H, -2.9703756984, 2.9042933784, 6.6720948238\H, -3.5820740075, 1.2592006282, 7.0046311192\H, -3.8251189427, 2.5611200241, 8.2002430076\H, 3.4682285555, 0.9892360929, 2.7359792876\S, 6.3329523246, 1.0798729086, 1.9446999759\S, 6.7748908292, -0.9751999249, -0.3625787401\S, 4.1473713378, -2.6951304876, -1.5214969532\C, 5.5968126412, 2.1785408243, 3.2047991276\H, 4.8343067963, 2.8357387085, 2.7802796312\H, 5.1839121743, 1.618285176, 4.0471078035\H, 6.4272494594, 2.7899629185, 3.5643086355\C, 6.651959456, 0.055011804, -1.8756421204\H, 5.9041953447, -0.3582405972, -2.5540031564\H, 6.4151798349, 1.0881114495, -1.6159739651\H, 7.6355356562, 0.0178742474, -2.3496889346\C, 5.0546467214, -4.0895304065, -0.7510444298\H, 6.0610597915, -3.7832228558, -0.4636797926\H, 4.5068246961, -4.4768436565, 0.1100566321\H, 5.1147819183, -4.8665885398, -1.5168347278\\Version=EM64L-G09RevC.01\State=2-A\HF=-3064.9933458\S2=0.772959\S2-1=0.\S2A=0.750248\RMSD=5.875e-09\RMSF=1.887e-06\Dipole=-0.3057323, -0.3859247, 0.3450768\Quadrupole=-3.9192783, 2.4127344, 1.5065439, 6.5083461, -4.8723851, -9.2870465

### 1[1]d

1\1\GINC-OCTOPUS\FOpt\UB3LYP\6-31G(d,p)\C29H33N4O7S3(2)\PIOTR\18-Aug-2013\0\#\P B3LYP/6-31G(d,p) FOpt Geom(NoAngle, noDistance) fcheck\1-(3,4,5-MeOphenyl)-3-(3,4,5-MeSphenyl)-5-(3,4,5-MeOphenyl)-6-oxoverdazyl\0,2\O, -0.0948893496, -0.494777948, 0.1446276066\C, -0.0613065851, -0.1758031841, 1.3199569055\N, 1.1259016757, -0.0948451323, 2.0647385285\N, 1.1767070885, 0.2852897537, 3.3763529791\C, 0.0070474764, 0.5404522075, 3.9578207442\N, -1.1941383411, 0.4809235444, 3.3864331229\N, -1.2092919839, 0.1459480874, 2.0612490606\C, -2.5222407875, 0.0396235847, 1.4847743343\C, -2.7587507819, 0.4236626843, 0.1628168866\C, -4.059997375, 0.3348631544, -0.3418675379\C, -5.1177867578, -0.1146386781, 0.4681410645\C, -4.8517580175, -0.4990477659, 1.794467785\C, -3.5545330597, -0.4168846307, 2.3089469264\C, 0.0467909334, 0.9330684534, 5.3919214787\C, -1.1090054432, 1.4066471299, 6.0194263949\C, -1.0898455081, 1.7828346131, 7.3668173281\C, 0.1118326413, 1.6790532758, 8.1085973648\C, 1.2715065019, 1.1863420909, 7.4714894053\C, 1.2344140694, 0.8250800544, 6.1221331793\C, 2.4104618052, -0.3120247917, 1.4546252542\C, 3.4832371555, 0.4529019589, 1.9221931535\C, 4.7541848107, 0.2448895885, 1.3803786378\C, 4.9515276669, -0.7130305567, 0.3696799062\C, 3.8600375869, -1.4812652885, -0.0707075818\C, 2.5836577577, -1.2861167935, 0.4683165323\O, -6.4036913241, -0.1323865736, -0.0008317314\O, 6.1778204744, -0.8613750724, -0.2208157721\H, -3.3297919603, -0.6939469786, 3.328061075\O, -5.9276771152, -0.9460067898, 2.500242208\C, -5.7279522051, -1.3294051093, 3.8514610493\H, -6.7063848876, -1.6376479645, 4.2221757073\H, -5.0274135691, -2.1699445656, 3.937468874\H, -5.358781505, -0.4931742252, 4.4590260046\C, -6.7369131667, -1.2725744688, -0.7965387984\H, -6.6304060114, -2.1994668982, -0.2199414685\H, -7.7820163092, -1.1476034347, -1.0868605703\H, -6.1137036765, -1.32338284, -1.695977479\O, -4.4068213478, 0.6717590773, -1.616085048\H, -1.9437731815, 0.7640446067, -0.4543730885\H, 2.1283376554, 0.4473553646, 5.6430748322\C, -3.3883243373, 1.1475016458, -2.4854264302\H, -2.9414089289, 2.0768893135, -2.1114260195\H, -2.5974845429, 0.4014070846, -2.6304971526\H, -3.879834807, 1.3445955352, -3.4389759019\H, -2.0120011326, 1.4806076494, 5.4301492688\H, 1.7411781759, -1.8633211646, 0.1254619893\O, 4.1468693511, -2.4053868858, -1.0291043498\C, 3.0773037526, -3.1769152173, -1.5560992738\H, 2.6156230363, -3.8096847827, -0.7872087179\H, 2.3055569559, -2.5421706358, -2.0080976961\H, 3.5195730919, -3.8120357522, -2.3248026014\C, 7.0714355682, -1.7371513146, 0.4703219372\H, 6.6596776811, -2.7516683586, 0.5324046004\H, 7.9931979419, -1.7580630627, -0.1146684543\H, 7.2900450345, -1.3650397147, 1.4776942144\O, 5.8699915658, 0.9276959365, 1.7611656312\H, 3.3112082212, 1.1789602048, 2.702269618\C, 5.7351403752, 1.927511827, 2.7611513525\H, 6.7330893014, 2.3446250233, 2.9016506796\H, 5.0517670673, 2.7249730318, 2.4439990018\H, 5.3810473819, 1.5072831733, 3.7107384564\S, -2.5369926959, 2.4193797606, 8.202308283\S, 0.0991439125, 2.1302575349, 9.8469852265\S, 2.

8677084815,1.0725848359,8.297117872\C,-3.7708404441,2.502856494,6.8581  
064218\H,-4.6647420814,2.9248779542,7.3224114343\H,-3.4493407813,3.161  
6474886,6.0482851232\H,-4.0149027967,1.5137046451,6.4632413192\C,0.824  
4014512,3.813471906,9.7728880625\H,0.8280903732,4.188136367,10.7991140  
852\H,1.8477155174,3.7676818651,9.3976009535\H,0.2090715388,4.46721995  
56,9.1526015644\C,2.6318073319,-0.3933771308,9.3725524995\H,1.86143175  
95,-0.2011186913,10.1202658947\H,2.381156943,-1.2724207341,8.775847953  
2\H,3.5899676878,-0.5587263266,9.8709669016\Version=EM64L-G09RevC.01\  
State=2-A\HF=-3064.9935939\S2=0.772528\S2-1=0.\S2A=0.75025\RMSD=9.998e  
-09\RMSF=2.956e-06\Dipole=-0.1674502,-0.5739845,-0.0790236\Quadrupole=  
-6.0389924,10.2157664,-4.176774,3.812212,7.4783169,3.5548653\PG=C01 [X  
(C29H33N4O7S3)]

## 1[1]e

1\1\GINC-OCTOPUS\FOpt\UB3LYP\6-31G(d,p)\C29H33N4O4S6(2)\PIOTR\18-Aug-2  
013\0\#P B3LYP/6-31G(d,p) FOpt Geom(NoAngle, noDistance) fcheck\1-(3  
,4,5-MeSphenyl)-3-(3,4,5-MeSphenyl)-5-(3,4,5-MeOphenyl)-6-oxoverdazyl\  
\0,2\O,0.0795312448,-0.3946970763,0.1721400689\C,0.0984716635,-0.15450  
69901,1.3648749539\N,1.2762305827,-0.1554691885,2.1306957421\N,1.32608  
40651,0.1724720968,3.4569920642\C,0.1573605853,0.4339664925,4.03653988  
86\N,-1.0386887345,0.4255402934,3.4492133148\N,-1.050818404,0.15085560  
28,2.1118274982\C,-2.3618443369,0.0934573876,1.5223980527\C,-2.5809133  
973,0.5245959117,0.2120231857\C,-3.880449969,0.477470791,-0.3035578702  
\C,-4.9527670837,0.0260856744,0.4859500449\C,-4.7035265779,-0.40726695  
05,1.8005706825\C,-3.4086257647,-0.3691264288,2.3251556136\C,0.1895379  
071,0.770666902,5.4847018145\C,-0.9653022117,1.2362894029,6.1199282571  
\C,-0.9529316411,1.5600155803,7.4810421292\C,0.2411700381,1.4127966785  
,8.2277749558\C,1.4004972546,0.9314808871,7.581656857\C,1.3694790141,0  
.6201134016,6.219796636\C,2.5550441499,-0.4023410331,1.5268544676\C,3.  
6612611792,0.272616286,2.0465093157\C,4.9369527682,0.0477267043,1.5208  
404914\C,5.1092894721,-0.8682736922,0.4551878247\C,3.9839273626,-1.563  
3311069,-0.0360266285\C,2.7107317075,-1.328101365,0.4925830377\O,-6.23  
43908408,0.0504511636,0.0073068448\H,-3.1963961951,-0.6866619635,3.335  
0162588\O,-5.7930636998,-0.8557183094,2.4836058649\C,-5.6097555933,-1.  
2982758284,3.8191633774\H,-6.5962332949,-1.602916836,4.1708912696\H,-4  
.9254913237,-2.1545583562,3.8740777324\H,-5.2294254064,-0.4947842644,4  
.4630053693\C,-6.5949505994,-1.0730175493,-0.8009229279\H,-6.525715360  
8,-2.0067197784,-0.2299037504\H,-7.6316651666,-0.9116896142,-1.1028953  
752\H,-5.9627159716,-1.1378213144,-1.6932090717\O,-4.2107310258,0.8582  
45178,-1.5688554523\H,-1.7560205769,0.8675543912,-0.3899348285\H,2.262  
8168232,0.248016969,5.7354699276\C,-3.1728105494,1.3183164999,-2.42435  
73334\H,-2.7008493306,2.2275724958,-2.0320068584\H,-2.4042046273,0.551  
1082445,-2.5773939538\H,-3.6526703567,1.5463714531,-3.3768586252\H,-1.  
8623302639,1.3453515901,5.5270730041\H,1.8635323191,-1.8653322494,0.09  
5310467\H,3.5017561566,0.963225463,2.8607169077\S,6.3806849624,0.90386  
77695,2.1333405165\S,6.7595659662,-1.1385822406,-0.1981445584\S,4.0702  
146058,-2.7238893105,-1.409650723\C,5.6882086229,1.9831814238,3.434256  
6361\H,4.9678413512,2.6997323569,3.0325420285\H,5.2382280264,1.4078354  
7,4.2465847221\H,6.5462121971,2.5319910842,3.8283522619\C,6.7021174367  
, -0.1031331113,-1.711459342\H,5.9461892467,-0.4822783896,-2.4005853417  
\H,6.5083088097,0.9394541117,-1.4540925241\H,7.6895166401,-0.183773198  
4,-2.1719907114\C,4.9061160179,-4.1633841258,-0.6411786783\H,5.9206592  
072,-3.903225126,-0.3377858342\H,4.3307422023,-4.5352296983,0.20865788  
65\H,4.9430529865,-4.9344807848,-1.4144213508\S,-2.399092793,2.1816806  
344,8.3287888358\S,0.2185641005,1.7932968254,9.9826537387\S,2.98922828  
31,0.7724912564,8.413963128\C,-3.6207713693,2.3317524276,6.9793442596\  
H,-4.5126916428,2.7480486137,7.4525007794\H,-3.2843040013,3.0159943979  
,6.1971674523\H,-3.8745963801,1.3611697822,6.5463053791\C,0.9514372758

, 3.4751299214, 9.9823348685\H, 0.9453057197, 3.8087971349, 11.0225676586\H  
, 1.9786601657, 3.4405025063, 9.6165473735\H, 0.3451256062, 4.1555127786, 9.  
3821312943\C, 2.7334863411, -0.7334870844, 9.4277540725\H, 1.9589490624, -0  
.5648486532, 10.1768768858\H, 2.4807081882, -1.5857154407, 8.7942545889\H,  
3.6865061751, -0.9264989773, 9.9259784522\Version=EM64L-G09RevC.01\Stat  
e=2-A\HF=-4033.9333935\S2=0.772905\S2-1=0.\S2A=0.750255\RMSD=3.039e-09  
\RMSF=2.746e-06\Dipole=-0.4347406, 0.0720259, -0.0435535\Quadrupole=-8.0  
10213, 8.8706763, -0.8604633, 8.1241289, 0.3454511, -2.0617092\PG=C01 [X(C2  
9H33N4O4S6)]\

## 1[1]f

1\1\GINC-OCTOPUS\FOpt\UB3LYP\6-31G(d,p)\C29H33N4O4S6(2)\PIOTR\19-Aug-2  
013\0\#P B3LYP/6-31G(d,p) FOpt Geom(NoAngle, noDistance) fcheck\1-(3  
, 4, 5-MeSphenyl)-3-(3, 4, 5-MeOphenyl)-5-(3, 4, 5-MeSphenyl)-6-oxoverdazyl\  
\0, 2\O, 0.0673654934, -0.3638337654, -0.0256197189\C, 0.0748876462, -0.1662  
118346, 1.1761099746\N, 1.244405981, -0.179788957, 1.9497896316\N, 1.284153  
4958, 0.0880143682, 3.2897010379\C, 0.1068072763, 0.3010050621, 3.879805459  
6\N, -1.0836186732, 0.305879066, 3.2790097851\N, -1.0797420142, 0.100269980  
7, 1.9273203926\C, -2.3832055393, 0.063368103, 1.3264265249\C, -2.595957201  
3, 0.5274913446, 0.0279676133\C, -3.8808049475, 0.487791145, -0.5264145196\  
C, -4.9697423109, 0.0000340843, 0.2343882187\C, -4.7384328838, -0.434207990  
4, 1.5573115736\C, -3.449513622, -0.4094890598, 2.0948404652\C, 0.123973872  
4, 0.5548185299, 5.3422854172\C, -1.0381221331, 1.0028411647, 5.9820359807\  
C, -1.0188671456, 1.2436039549, 7.3581860186\C, 0.159070661, 1.0396221845, 8  
.1008754161\C, 1.3157495431, 0.5753056484, 7.447700035\C, 1.3012400276, 0.3  
41150806, 6.0696043661\C, 2.5292437871, -0.3673924657, 1.338176895\C, 3.604  
8159737, 0.3625940192, 1.8458650437\C, 4.8851369084, 0.1957442825, 1.309598  
268\C, 5.0924988447, -0.722631409, 0.2523628563\C, 3.9969428211, -1.4704550  
748, -0.2291241474\C, 2.7178926991, -1.2883514067, 0.3062943499\H, -3.27778  
36711, -0.7483328334, 3.1069641251\H, -1.7595157515, 0.8969370997, -0.54112  
46246\H, 2.1792464773, -0.0179264612, 5.5518359646\O, 2.399071035, 0.380541  
7345, 8.2506715059\C, 3.5988437026, -0.0819121694, 7.6511921505\H, 4.323920  
5114, -0.1673114221, 8.4616617032\H, 3.4662159907, -1.0635175613, 7.1787872  
586\H, 3.976878104, 0.6261322802, 6.9024587557\O, 0.2118445823, 1.339292125  
3, 9.4347781527\C, -0.368642604, 0.3595131273, 10.299691085\H, -0.239673214  
, 0.7361970327, 11.3162992606\H, -1.4361840445, 0.2303965736, 10.0924328335  
\H, 0.146638858, -0.6039091657, 10.2035618474\O, -2.0901484467, 1.683542854  
3, 8.0788152672\H, -1.9322996544, 1.1606543556, 5.3960830603\H, 1.891490619  
1, -1.8639926943, -0.0823096867\C, -3.3041228571, 1.9358067906, 7.386372534  
2\H, -3.1790571676, 2.7146895628, 6.624058707\H, -3.6965523432, 1.028180744  
9, 6.9108137948\H, -4.0113741586, 2.2819601965, 8.1412292182\H, 3.416743831  
9, 1.0498282708, 2.6574811425\S, 6.2913966307, 1.1287787595, 1.8981258567\S  
, 6.7517594216, -0.9306788169, -0.4011087016\S, 4.1289782995, -2.6347719065  
, -1.5958179475\C, 5.5442692396, 2.2332445706, 3.1465505454\H, 4.7914362473  
, 2.8935887292, 2.7098616095\H, 5.1171979654, 1.6765411431, 3.9841364994\H,  
6.3729647647, 2.840799348, 3.516391253\C, 6.6519526886, 0.0881502826, -1.92  
35962831\H, 5.9098002487, -0.3263495611, -2.6072368121\H, 6.4187981372, 1.1  
248299208, -1.675323466\H, 7.6407981659, 0.0409899958, -2.3855806799\C, 5.0  
171508308, -4.035966064, -0.8150209345\H, 6.0217200239, -3.7365350427, -0.5  
1451041\H, 4.4557318972, -4.4207090665, 0.0383764023\H, 5.0819348078, -4.81  
24378415, -1.5809857641\S, -6.0260268337, -1.142780478, 2.5969886025\S, -6.  
6091662474, -0.0071105522, -0.4970613153\S, -4.2000590338, 1.0263726935, -2  
.1994564586\C, -7.0063335329, 0.3389760677, 3.0492152825\H, -6.3811560073,  
1.0753226014, 3.5578635119\H, -7.4748021052, 0.7746565763, 2.1660188107\H,  
-7.7799186222, -0.0120489875, 3.7364182222\C, -6.7340427404, -1.7556847154  
, -1.0379113361\H, -5.9428969906, -1.9913087785, -1.7515524471\H, -6.693184  
2599, -2.4221133297, -0.1751050937\H, -7.7048930268, -1.8535640499, -1.5291  
751363\C, -2.5253201894, 1.4009901184, -2.8273173852\H, -2.0787568937, 2.25

85429675,-2.3186046236\H,-1.8622335299,0.5356017898,-2.76131976\H,-2.6714637156,1.6567094042,-3.8790040346\\Version=EM64L-G09RevC.01\State=2-A\HF=-4033.9336692\S2=0.773683\S2-1=0.\S2A=0.75025\RMSD=5.621e-09\RMSF=1.315e-06\Dipole=0.1109692,0.0812729,0.3221373\Quadrupole=0.1276076,1.8563627,-1.9839702,1.0208799,-6.6171911,-5.2830034\PG=C01 [X(C29H33N4O4S6)]\@.

## 7

1\1\GINC-OCTOPUS\FOpt\UB3LYP/6-31G(2d,p)\C20H15N4O1(2)\PIOTR\24-Sep-2013\0\#\#P UB3LYP/6-31G(2d,p) FOpt freq(noraman, ReadIso) SCF=Direct #P Geom=(NoDistance,NoAngle) fcheck\Diphenyl Ph oxoverdazyl, C2 symm\0,2\O,-0.0000001195,0.000000097,0.\C,-0.0000001237,0.000000026,1.212299\N,1.168904,0.,1.981875\N,1.186171,-0.027779,3.343929\C,-0.0000001331,-0.000000135,3.945118\N,-1.1861712621,0.0277789801,3.3439289921\N,-1.1689042527,-0.0000000039,1.9818749919\C,-2.460316,0.080132,1.363616\C,-2.750996,-0.609957,0.183738\C,-4.030179,-0.523959,-0.358266\C,-5.0181139998,0.2368860041,0.263009\C,-4.720682,0.91682,1.442658\C,-3.44713,0.841553,1.99556\C,-0.0000001383,-0.0000000222,5.429338\C,-1.195187,-0.174495,6.138605\C,-1.192503,-0.174197,7.529656\C,-0.0000001479,-0.0000000386,8.230408\C,1.1925027089,0.174196931,7.5296560103\C,1.1951867186,0.1744949473,6.1386050103\C,2.4603157516,-0.0801319966,1.3636160161\C,3.4471297472,-0.841553004,1.9955600139\C,4.720681751,-0.9168199975,1.4426580219\C,5.018113759,-0.2368859877,0.2630090319\C,4.0301787635,0.5239590236,-0.358265966\C,2.7509957597,0.6099570173,0.1837380262\H,-3.206424,1.360584,2.91391\H,-5.480343,1.513814,1.936376\H,-6.011879,0.298637,-0.167703\H,-4.252152,-1.063304,-1.273128\H,-1.988383,-1.199309,-0.302638\H,2.11837,0.314389,5.589932\H,2.124833,0.313178,8.067456\H,-0.0000001517,-0.000000045,9.315657\H,-2.1248332948,-0.3131780753,8.0674559816\H,-2.1183702776,-0.3143890462,5.5899319817\H,1.9883827631,1.199309023,-0.3026379722\H,4.2521517698,1.0633040344,-1.2731279581\H,6.0118787622,-0.2986369786,-0.1677029619\H,5.4803427476,-1.5138140033,1.9363760201\H,3.2064237409,-1.3605840148,2.9139100062\\Version=EM64L-G09RevC.01\State=2-A\HF=-1065.3828073\S2=0.772858\S2-1=0.\S2A=0.750235\RMSD=8.426e-09\RMSF=4.076e-06\Dipole=0.,0.,0.3011737\Quadrupole=7.884192,-7.2363581,-0.6478339,-1.7822696,0.,0.\PG=C02 [C2(H1C1C1C1O1),X(C16H14N4)]\@

## 6. References

- 1 A. Jankowiak, P. Kaszynski *Beils. J. Org. Chem.* 2012, **8**, 275.
- 2 A. Nowak-Król, D. Gryko, D. T. Gryko *Chem. Asian J.* 2010, **5**, 904.
- 3 A. Jankowiak, D. Pocięcha, H. Monobe, J. Szczytko, P. Kaszyński *Chem. Commun.* 2012, **48**, 7064
- 4 A. Jankowiak, Ź. Dębska, P. Kaszyński, J. Romański *J. Sulfur Chem.* 2012, **33**, 1.
